# Supplementary material for: Anticancer Drug 2-Methoxyestradiol Protects against Renal Ischemia/Reperfusion Injury by Reducing Inflammatory Cytokines Expression
Source: Hindawi journal article supplement (doi:10.1155/2014/431524), 2014-01-01
Supplement: f1 [file 431524.f1.pdf]

## Supplementary data

### Material and Methods

**Table S1.** Primer pairs used in this study.

| Factor         | Primer sequence (5'-3')    |
|----------------|----------------------------|
| HIF-1 $\alpha$ | F-GCACTAGACAAAGTTCACCTGAGA |
|                | R-CGCTATCCACATCAAAGCAA     |
| BNIP3          | F-GAACTGCACTTCAGCAATGG     |
|                | R-GCCAGCAGATGAGACAGTAA     |
| Casapase-3     | F-GCGGGGAGCTTGGAACGCTA     |
|                | R-ACCCCGGCAGGCCTGAATGA     |
| Bcl-2          | F-AGCAACCCAATGCCCGCTGT     |
|                | R-TGTGGCCCAGGTATGCACCCA    |
| IL-1 $\beta$   | F-GTGGCTGTGGAGAAGCTGTGGC   |
|                | R-TGGGTCCGACAGCACGAGGC     |
| TNF- $\alpha$  | F-GAGTGACAAGCCTGTGCCCA     |
|                | R-CCCTTCTCCAGCTGGAAGA      |
| $\beta$ -actin | F-GGGAATGGGTCAGAAGGACT     |
|                | R-TTTGATGTCACGCACGATTT     |
